# Supplementary material for: A Comparison of the Pac-X Trans-Pacific Wave Glider Data and Satellite Data (MODIS, Aquarius, TRMM and VIIRS)
Source: PLOS journal article supplement (doi:10.1371/journal.pone.0092280), 2014-03-21

Figure S3. Photodocumentation of *Fontaine Maru*. A. Hawaii recovery. The circular C3 sensor head can be seen at the left of the glider. B. After recovery in the western Pacific..

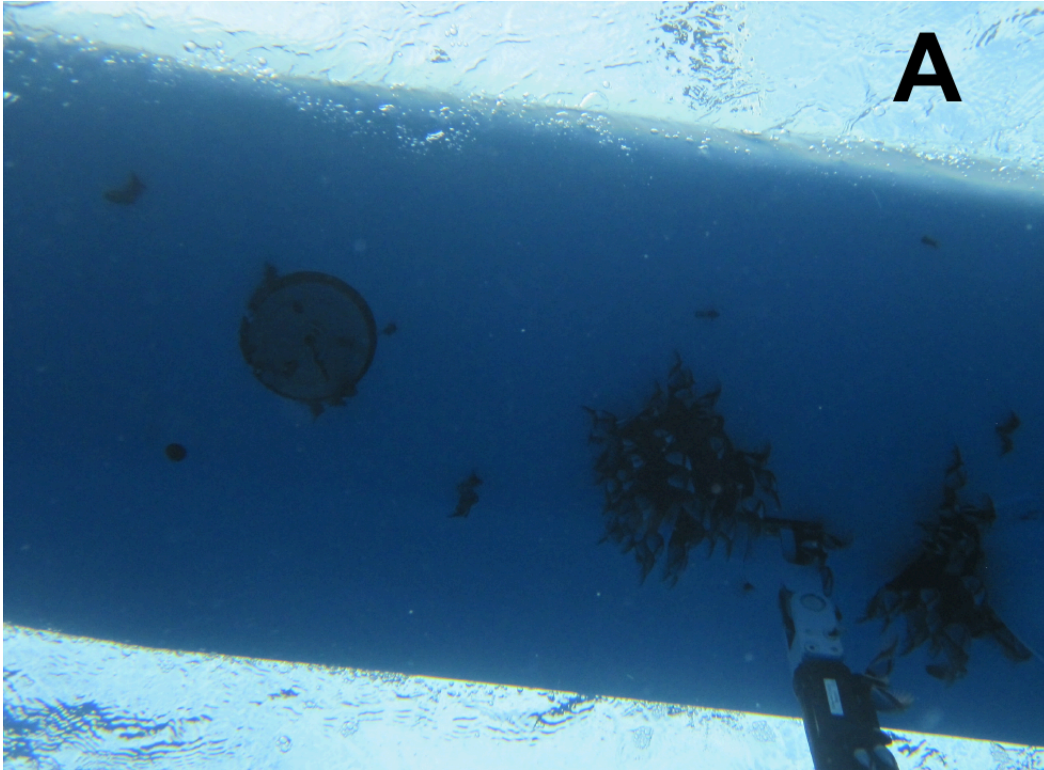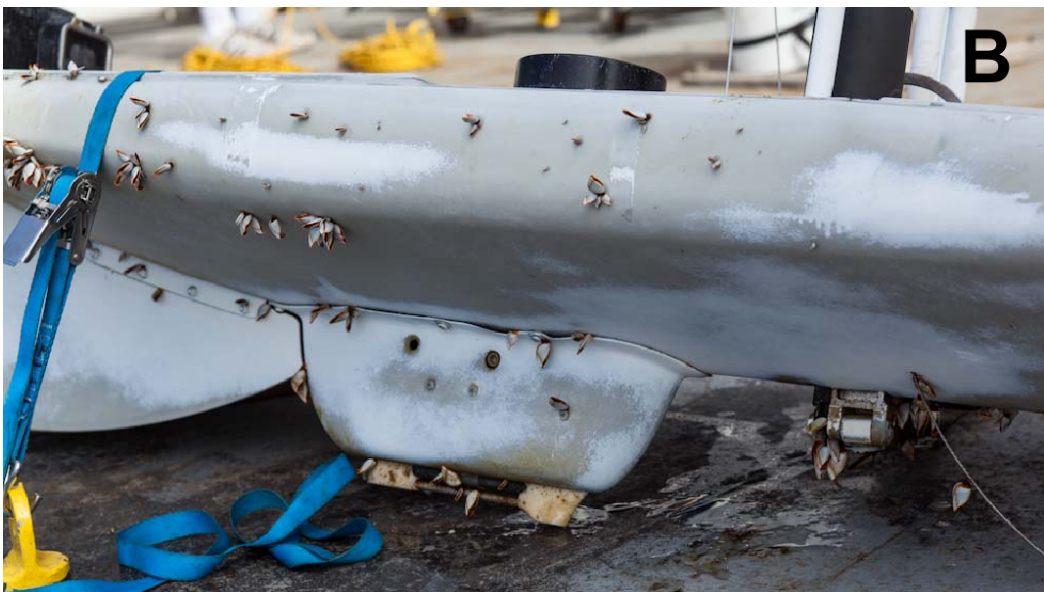

Supplement: S3 (10.1371/journal.pone.0092280.s003) [file journal.pone.0092280.s003]
